# Supplementary material for: Prevalence of early-onset neonatal infection among newborns of mothers with bacterial infection or colonization: a systematic review and meta-analysis
Source: PubMed Central journal article supplement (PMC4364328; doi:10.1186/s12879-015-0813-3), 2015-03-07
Supplement: 12879_2015_813_MOESM2_ESM.pdf [file 12879_2015_813_MOESM2_ESM.pdf]

**Appendix Table 2. Studies included in systematic review and meta-analysis**

| Author             | Year | Country      | Study sample size | Study Type | Setting         | Urban or rural | Timing of EOS diagnosis | Antibiotic use | Specialized population | WHO region | NMR | Income (USD) |
|--------------------|------|--------------|-------------------|------------|-----------------|----------------|-------------------------|----------------|------------------------|------------|-----|--------------|
| AbeleHorn          | 1997 | Germany      | 395               | Cohort     | Health facility | Urban          | Unknown                 | Not used       | Other                  | EUR        | 2   | 43110        |
| Adriaanse          | 1995 | Netherlands  | 1020              | Cohort     | Multi-center    | Urban          | ≤7 days                 | Not used       | All                    | EUR        | 3   | 49050        |
| Andrews            | 2008 | USA          | 5732              | Cohort     | Health facility | Urban          | ≤7 days                 | Unknown        | All                    | AMR        | 4   | 47390        |
| Averbuch           | 1995 | Israel       | 90                | Cohort     | Health facility | Urban          | Unknown                 | Unknown        | PPROM                  | EUR        | 2   | 27170        |
| Ayata              | 1994 | Turkey       | 114               | Cohort     | Health facility | Urban          | ≤7 days                 | Unknown        | All                    | EUR        | 12  | 9890         |
| Ayengar            | 1991 | India        | 1792              | Cohort     | Health facility | Urban          | ≤7 days                 | Unknown        | All                    | SEAR       | 34  | 1330         |
| Berardi            | 2011 | Italy        | 4699              | Cohort     | Multi-center    | Urban          | Unknown                 | Used           | All                    | EUR        | 2   | 35150        |
| Blott              | 1988 | UK           | 30                | Cohort     | Health facility | Urban          | ≤7 days                 | Unknown        | Prolonged ROM          | EUR        | 3   | 38370        |
| Bobitt             | 1985 | USA          | 937               | Cohort     | Health facility | Urban          | Unknown                 | Used           | All                    | AMR        | 4   | 47390        |
| Bobitt             | 1977 | USA          | 12                | Cohort     | Health facility | Urban          | Unknown                 | Unknown        | PT/PROM                | AMR        | 4   | 47390        |
| Bourgeois-Nicolaos | 2010 | France       | 1139              | Cohort     | Health facility | Urban          | ≤7 days                 | Unknown        | All                    | EUR        | 2   | 42390        |
| Boyer              | 1981 | USA          | 924               | Cohort     | Health facility | Urban          | ≤7 days                 | Not used       | PT/PROM                | AMR        | 4   | 47390        |
| Broekhuizen        | 1985 | USA          | 53                | Cohort     | Health facility | Urban          | Unknown                 | Unknown        | PPROM                  | AMR        | 4   | 47390        |
| Buckler            | 2010 | USA          | 242               | Cohort     | Health facility | Urban          | Unknown                 | Used           | All                    | AMR        | 4   | 47390        |
| Burman             | 1992 | Sweden       | 4559              | Cohort     | Multi-center    | Unknown        | Unknown                 | Not used       | All                    | EUR        | 2   | 50110        |
| Canpolat           | 2011 | Turkey       | 74                | Cohort     | Health facility | Urban          | ≤7 days                 | Used           | PPROM                  | EUR        | 12  | 9890         |
| Cararach           | 1998 | Spain        | 733               | Cohort     | Multi-center    | Unknown        | ≤7 days                 | Unknown        | PROM                   | EUR        | 2   | 31750        |
| Carlan*            | 1997 | USA          | 93                | Cohort     | Health facility | Urban          | ≤7 days                 | Used           | PPROM                  | AMR        | 4   | 47390        |
| Christensen        | 1982 | Sweden       | 300               | Cohort     | Health facility | Unknown        | ≤7 days                 | Unknown        | All                    | EUR        | 2   | 50110        |
| Christmas          | 1992 | USA          | 94                | Cohort     | Health facility | Unknown        | Unknown                 | Used           | PPROM                  | AMR        | 4   | 47390        |
| Coultrip           | 1994 | USA          | 89                | Cohort     | Multi-center    | Urban          | Unknown                 | Used           | Preterm                | AMR        | 4   | 47390        |
| Craig              | 1996 | Australia    | 24                | Cohort     | Health facility | Urban          | Unknown                 | Used           | All                    | WPR        | 3   |              |
| Cutland            | 2009 | South Africa | 8011              | Cohort     | Health facility | Urban          | ≤7 days                 | Used           | All                    | AFR        | 19  | 6090         |
| de Araujo          | 1994 | Brazil       | 223               | Cohort     | Health facility | Urban          | ≤7 days                 | Used           | All                    | AMR        | 12  | 9390         |
| Dollner            | 2002 | Norway       | 221               | Cohort     | Health facility | Urban          | ≤7 days                 | Used           | All                    | EUR        | 2   | 84290        |
| Dudley             | 1991 | Australia    | 81                | Cohort     | Health facility | Urban          | ≤7 days                 | Used           | PPROM                  | WPR        | 3   |              |
| Dutta              | 2010 | India        | 728               | Cohort     | Health facility | Urban          | ≤7 days                 | Used           | Preterm                | SEAR       | 34  | 1330         |
| Easmon             | 1985 | UK           | 1457              | Cohort     | Health facility | Urban          | Unknown                 | Used           | All                    | EUR        | 3   | 38370        |
| Elder*             | 1971 | USA          | 9156              | Cohort     | Health facility | Urban          | Unknown                 | Not used       | All                    | AMR        | 4   | 47390        |
| El-Kersh           | 2002 | Saudi Arabia | 217               | Cohort     | Health facility | Urban          | ≤7 days                 | Not used       | All                    | EMR        | 12  |              |
| Elzbieta           | 2009 | Poland       | 100               | Cohort     | Health facility | Unknown        | ≤7 days                 | Used           | All                    | EUR        | 4   | 12440        |
| Eren               | 2005 | Turkey       | 500               | Cohort     | Health facility | Urban          | ≤7 days                 | Unknown        | Other                  | EUR        | 12  | 9890         |
| Faro               | 2010 | USA          | 2108              | Cohort     | Multi-center    | Urban          | ≤7 days                 | Used           | All                    | AMR        | 4   | 47390        |
| Feinstein          | 1986 | USA          | 146               | Cohort     | Health facility | Urban          | Unknown                 | Not used       | PROM                   | AMR        | 4   | 47390        |
| Franciosi          | 1973 | USA          | 1020              | Cohort     | Health facility | Unknown        | ≤7 days                 | Unknown        | All                    | AMR        | 4   | 47390        |
| Frederiksen*       | 1992 | Denmark      | 30                | Cohort     | Community       | Unknown        | ≤7 days                 | Unknown        | All                    | EUR        | 2   | 59050        |
| Gauthier           | 1994 | USA          | 225               | Cohort     | Health facility | Urban          | Unknown                 | Not used       | PPROM                  | AMR        | 4   | 47390        |
| Gerard             | 1979 | Belgium      | 1115              | Cohort     | Health facility | Urban          | ≤7 days                 | Unknown        | All                    | EUR        | 2   | 45910        |
| Ghanim             | 2011 | USA          | 6626              | Cohort     | Health facility | Urban          | Unknown                 | Used           | All                    | AMR        | 4   | 47390        |

**Appendix Table 2. Studies included in systematic review and meta-analysis (continued)**

| Author      | Year | Country     | Study sample size | Study Type | Setting         | Urban or rural | Timing of EOS diagnosis | Antibiotic use | Specialized population | WHO region | NMR | Income (USD) |
|-------------|------|-------------|-------------------|------------|-----------------|----------------|-------------------------|----------------|------------------------|------------|-----|--------------|
| Gibbs       | 1981 | USA         | 48                | Cohort     | Health facility | Unknown        | Unknown                 | Used           | All                    | AMR        | 4   | 47390        |
| Gibbs       | 1988 | USA         | 48                | Cohort     | Health facility | Unknown        | ≤7 days                 | Used           | Other                  | AMR        | 4   | 47390        |
| Gilbert     | 2005 | UK centers  | 8797              | Cohort     | Multi-center    | Unknown        | Unknown                 | Not used       | PT/PROM                | EUR        | 3   | 38370        |
| Goldenberg  | 2008 | USA         | 351               | Cohort     | Health facility | Unknown        | ≤7 days                 | Unknown        | Preterm                | AMR        | 4   | 47390        |
| Graham      | 1982 | USA         | 9069              | Cohort     | Health facility | Urban          | Unknown                 | Used           | PPROM                  | AMR        | 4   | 47390        |
| Hashavya    | 2011 | Israel      | 1648              | Cohort     | Health facility | Urban          | ≤7 days                 | Used           | All                    | EUR        | 2   | 27170        |
| Hervas      | 1993 | Spain       | 1003              | Cohort     | Health facility | Urban          | Unknown                 | Unknown        | All                    | EUR        | 2   | 31750        |
| Hickman     | 1999 | USA         | 546               | Cohort     | Multi-center    | Urban          | ≤7 days                 | Used           | All                    | AMR        | 4   | 47390        |
| Hvckel      | 1992 | Germany     | 18                | Cohort     | Health facility | Urban          | ≤7 days                 | Not used       | PPROM                  | EUR        | 2   | 43110        |
| Itakura     | 1996 | Japan       | 1280              | Cohort     | Health facility | Urban          | ≤7 days                 | Unknown        | All                    | WPR        | 1   | 41850        |
| Kadanali    | 2005 | Turkey      | 150               | Cohort     | Health facility | Urban          | ≤7 days                 | Not used       | All                    | EUR        | 12  | 9890         |
| Kafetzis    | 2004 | Greece      | 251               | Cohort     | Health facility | Urban          | ≤7 days                 | Unknown        | All                    | EUR        | 2   | 26940        |
| Kalinka     | 2006 | Poland      | 120               | Cohort     | Health facility | Urban          | ≤7 days                 | Not used       | All                    | EUR        | 4   | 12440        |
| Kappy       | 1979 | USA         | 188               | Cohort     | Health facility | Urban          | Unknown                 | Used           | PROM                   | AMR        | 4   | 47390        |
| Kasper      | 2010 | Austria     | 118               | Cohort     | Health facility | Urban          | ≤7 days                 | Unknown        | Preterm                | EUR        | 2   | 47060        |
| Kishore     | 1987 | India       | 109               | Cohort     | Health facility | Urban          | ≤7 days                 | Not used       | All                    | SEAR       | 34  | 1330         |
| Koh         | 1979 | USA         | 26129             | Cohort     | Health facility | Urban          | Unknown                 | Used           | All                    | AMR        | 4   | 47390        |
| Kollee      | 1989 | Netherlands | 632               | Cohort     | Health facility | Urban          | ≤7 days                 | Unknown        | All                    | EUR        | 3   | 49050        |
| Kordek      | 2006 | Poland      | 46                | Cohort     | Health facility | Urban          | ≤7 days                 | Used           | PT/PROM                | EUR        | 4   | 12440        |
| Kordek      | 2011 | Poland      | 286               | Cohort     | Health facility | Urban          | ≤7 days                 | Used           | All                    | EUR        | 4   | 12440        |
| Kunze*      | 2006 | Germany     | 1438              | Cohort     | Health facility | Urban          | ≤7 days                 | Used           | All                    | EUR        | 2   | 43110        |
| Kunze       | 2011 | Germany     | 869               | Cohort     | Health facility | Urban          | ≤7 days                 | Used           | All                    | EUR        | 2   | 43110        |
| Liang       | 1986 | Hong Kong   | 168               | Cohort     | Health facility | Urban          | ≤7 days                 | Not used       | All                    | WPR        | 1   |              |
| Lijoi       | 2007 | Italy       | 2158              | Cohort     | Health facility | Urban          | ≤7 days                 | Not used       | All                    | EUR        | 2   | 35150        |
| Lim         | 1997 | Malaysia    | 196               | Cohort     | Health facility | Urban          | ≤7 days                 | Unknown        | All                    | WPR        | 3   | 7760         |
| Matorras    | 1991 | Spain       | 1050              | Cohort     | Health facility | Urban          | ≤7 days                 | Not used       | All                    | EUR        | 2   | 31750        |
| Matsubara   | 2002 | Japan       | 583               | Cohort     | Health facility | Urban          | Unknown                 | Unknown        | All                    | WPR        | 1   | 41850        |
| Matsuda     | 1995 | Japan       | 41                | Cohort     | Health facility | Urban          | Unknown                 | Unknown        | Preterm                | WPR        | 1   | 41850        |
| McCaul      | 1992 | USA         | 367               | Cohort     | Health facility | Urban          | Unknown                 | Not used       | PT/PROM                | AMR        | 4   | 47390        |
| McGrady*    | 1985 | USA         | 1342              | Cohort     | Community       | Mixed          | Unknown                 | Unknown        | All                    | AMR        | 4   | 47390        |
| McLauchlin* | 1990 | UK          | 248               | Population | Community       | Mixed          | ≤7 days                 | Unknown        | All                    | EUR        | 3   | 38370        |
| Mercer      | 1999 | USA         | 8474              | Cohort     | Multi-center    | Urban          | ≤7 days                 | Used           | All                    | AMR        | 4   | 47390        |
| Mercer      | 1997 | USA         | 1867              | Cohort     | Multi-center    | Unknown        | ≤7 days                 | Not used       | PPROM                  | AMR        | 4   | 47390        |
| Merenstein  | 1980 | USA         | 1815              | Cohort     | Unknown         | Unknown        | ≤7 days                 | Not used       | All                    | AMR        | 4   | 47390        |
| Mitra       | 1997 | India       | 100               | Cohort     | Unknown         | Unknown        | ≤7 days                 | Used           | PROM                   | SEAR       | 34  | 1330         |
| Mitsuda     | 1996 | Japan       | 466               | Cohort     | Health facility | Urban          | ≤7 days                 | Unknown        | All                    | WPR        | 1   | 41850        |
| Morales*    | 1989 | USA         | 212               | Cohort     | Multi-center    | Urban          | Unknown                 | Not used       | PPROM                  | AMR        | 4   | 47390        |
| Morales     | 1987 | USA         | 260               | Cohort     | Health facility | Urban          | ≤7 days                 | Used           | PPROM                  | AMR        | 4   | 47390        |
| Morales     | 1986 | USA         | 1207              | Cohort     | Unknown         | Unknown        | Unknown                 | Not used       | All                    | AMR        | 4   | 47390        |

**Appendix Table 2. Studies included in systematic review and meta-analysis (continued)**

| Author           | Year | Country   | Study sample size | Study Type | Setting         | Urban or rural | Timing of EOS diagnosis | Antibiotic use | Specialized population | WHO region | NMR | Income (USD) |
|------------------|------|-----------|-------------------|------------|-----------------|----------------|-------------------------|----------------|------------------------|------------|-----|--------------|
| Muthusami        | 2007 | India     | 77                | Cohort     | Health facility | Urban          | ≤7 days                 | Unknown        | All                    | SEAR       | 34  | 1330         |
| Nadisauskiene    | 1996 | Lithuania | 102               | Cohort     | Health facility | Urban          | Unknown                 | Not used       | Preterm                | EUR        | 3   | 11390        |
| Namavar Jahromi  | 2008 | Iran      | 1197              | Cohort     | Health facility | Urban          | ≤7 days                 | Used           | All                    | EMR        | 19  | 2500         |
| Natale           | 1995 | Italy     | 7176              | Cohort     | Multi-center    | Unknown        | ≤7 days                 | Used           | All                    | EUR        | 2   | 35150        |
| Newton           | 1989 | USA       | 2908              | Cohort     | Health facility | Urban          | Unknown                 | Used           | All                    | AMR        | 4   | 47390        |
| Niduvaje         | 2006 | Singapore | 4553              | Cohort     | Health facility | Urban          | ≤7 days                 | Used           | All                    | WPR        | 1   | 40070        |
| Nolla-Salas*     | 1998 | Spain     | 15                | Population | Multi-center    | Urban          | ≤7 days                 | Unknown        | All                    | EUR        | 2   | 31750        |
| Orrett           | 2003 | Trinidad  | 201               | Cohort     | Multi-center    | Unknown        | ≤7 days                 | Unknown        | All                    | AMR        | 23  | 15380        |
| Papantoniou      | 1997 | Greece    | 32                | Cohort     | Health facility | Urban          | Unknown                 | Used           | PPROM                  | EUR        | 2   | 26940        |
| Pass             | 1982 | USA       | 68                | Cohort     | Multi-center    | Urban          | Unknown                 | Used           | All                    | AMR        | 4   | 47390        |
| Pearson*         | 1967 | USA       | 12000             | Population | Health facility | Urban          | Unknown                 | Unknown        | All                    | AMR        | 4   | 47390        |
| Persson*         | 1986 | Sweden    | 1786              | Nested     | Health facility | Urban          | ≤7 days                 | Used           | All                    | EUR        | 2   | 50110        |
| Philip           | 1982 | USA       | 524               | Cohort     | Health facility | Urban          | ≤7 days                 | Unknown        | All                    | AMR        | 4   | 47390        |
| Pinter           | 2009 | USA       | 317               | Cohort     | Health facility | Urban          | ≤7 days                 | Unknown        | All                    | AMR        | 4   | 47390        |
| Piper            | 1999 | USA       | 1046              | Cohort     | Health facility | Urban          | Unknown                 | Used           | All                    | AMR        | 4   | 47390        |
| Puchner          | 1993 | Austria   | 80                | Cohort     | Unknown         | Unknown        | Unknown                 | Not used       | All                    | EUR        | 2   | 47060        |
| Puopolo          | 2011 | USA       | 1413              | Nested     | Multi-center    | Unknown        | ≤7 days                 | Used           | All                    | AMR        | 4   | 47390        |
| Pylipow          | 1994 | USA       | 2040              | Cohort     | Health facility | Urban          | ≤7 days                 | Used           | All                    | AMR        | 4   | 47390        |
| Quentin*         | 1989 | France    | 114               | Cohort     | Health facility | Urban          | Unknown                 | Unknown        | PPROM                  | EUR        | 2   | 42390        |
| Regan            | 1996 | USA       | 13646             | Cohort     | Multi-center    | Urban          | Unknown                 | Not used       | All                    | AMR        | 4   | 47390        |
| Reid             | 1975 | UK        | 369               | Cohort     | Health facility | Urban          | Unknown                 | Used           | All                    | EUR        | 3   | 38370        |
| Rosemond         | 1995 | USA       | 224               | Cohort     | Health facility | Urban          | Unknown                 | Used           | PPROM                  | AMR        | 4   | 47390        |
| Saez-Llorens     | 1995 | Panama    | 800               | Cohort     | Health facility | Urban          | ≤7 days                 | Not used       | PT/PROM                | AMR        | 10  | 6970         |
| Sensini          | 1997 | Italy     | 2300              | Cohort     | Health facility | Urban          | ≤7 days                 | Unknown        | All                    | EUR        | 2   | 35150        |
| Seoud            | 2010 | Lebanon   | 779               | Cohort     | Multi-center    | Urban          | Unknown                 | Used           | All                    | EMR        | 7   | 8880         |
| Simor            | 1990 | Canada    | 10                | Cohort     | Health facility | Urban          | ≤7 days                 | Unknown        | All                    | AMR        | 4   | 43270        |
| Smith*           | 2009 | Denmark   | 37                | Cohort     | Health facility | Urban          | Unknown                 | Used           | All                    | EUR        | 2   | 59050        |
| Sperling         | 1987 | USA       | 264               | Cohort     | Health facility | Urban          | ≤7 days                 | Used           | Other                  | AMR        | 4   | 47390        |
| Spinnato         | 1987 | USA       | 114               | Cohort     | Health facility | Urban          | Unknown                 | Unknown        | PPROM                  | AMR        | 4   | 47390        |
| Suara            | 1994 | Gambia    | 196               | Cohort     | Health facility | Unknown        | ≤7 days                 | Unknown        | All                    | AFR        | 32  | 7740         |
| Syrogiannopoulos | 1990 | Greece    | 640               | Cohort     | Health facility | Unknown        | ≤7 days                 | Unknown        | All                    | EUR        | 2   | 26940        |
| Tafari           | 1979 | Ethiopia  | 1351              | Cohort     | Health facility | Urban          | ≤7 days                 | Unknown        | All                    | AFR        | 36  | 390          |
| Towers           | 1990 | USA       | 131               | Cohort     | Health facility | Urban          | Unknown                 | Used           | PT/PROM                | AMR        | 4   | 47390        |
| Tsolia           | 2003 | Greece    | 1014              | Cohort     | Multi-center    | Urban          | ≤7 days                 | Used           | All                    | EUR        | 2   | 26940        |
| Tuppurainen*     | 1989 | Finland   | 8977              | Cohort     | Health facility | Urban          | ≤7 days                 | Not used       | All                    | EUR        | 2   | 47720        |
| Varner           | 1981 | USA       | 116               | Cohort     | Health facility | Urban          | Unknown                 | Not used       | PROM                   | AMR        | 4   | 47390        |
| Vergani*         | 2002 | USA       | 32630             | Cohort     | Health facility | Urban          | ≤7 days                 | Not used       | All                    | AMR        | 4   | 47390        |
| Visconti         | 1985 | Italy     | 1516              | Cohort     | Multi-center    | Urban          | Unknown                 | Unknown        | All                    | EUR        | 2   | 35150        |
| Volumenie        | 2001 | France    | 5374              | Cohort     | Health facility | Urban          | Unknown                 | Used           | All                    | EUR        | 2   | 42390        |

**Appendix Table 2. Studies included in systematic review and meta-analysis (continued)**

| <b>Author</b> | <b>Year</b> | <b>Country</b> | <b>Study</b> | <b>Study</b> | <b>Setting</b>  | <b>Urban or</b> | <b>Timing of</b> | <b>Antibiotic</b> | <b>Specialized</b> | <b>WHO</b> | <b>NMR</b> | <b>Income</b> |
|---------------|-------------|----------------|--------------|--------------|-----------------|-----------------|------------------|-------------------|--------------------|------------|------------|---------------|
| Wallace       | 1983        | USA            | 11           | Cohort       | Health facility | Urban           | ≤7 days          | Used              | Preterm            | AMR        | 4          | 47390         |
| Weintraub     | 1983        | Israel         | 385          | Cohort       | Health facility | Urban           | ≤7 days          | Unknown           | All                | EUR        | 2          | 27170         |
| Wilson        | 1982        | USA            | 143          | Cohort       | Health facility | Urban           | ≤7 days          | Used              | PPROM              | AMR        | 4          | 47390         |
| Wood*         | 1981        | USA            | 569          | Cohort       | Multi-center    | Urban           | Unknown          | Unknown           | All                | AMR        | 4          | 47390         |
| Yoon          | 2000        | South Korea    | 315          | Cohort       | Health facility | Urban           | ≤7 days          | Unknown           | Preterm            | WPR        | 2          | 17890         |

\* 15 studies were not included in the quantitative meta-analyses, but were included in the qualitative assessment.

NMR: Neonatal mortality rate (per 1000 live births); EOS: early-onset sepsis; LBW: low birth weight; PROM: premature rupture of membrane;

PPROM: preterm premature rupture of membrane; PT/PROM: Preterm or premature rupture of membrane

WHO: World Health Organization; AFR: Africa; AMR: Americas; EMR: East Mediterranean; EUR: Europe; SEAR: South East Asia; WPR: Western Pacific

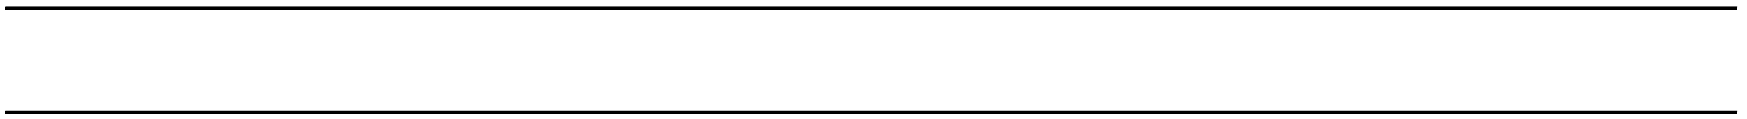

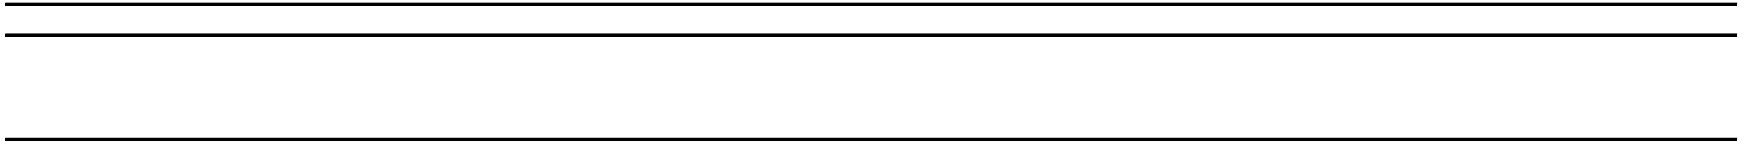

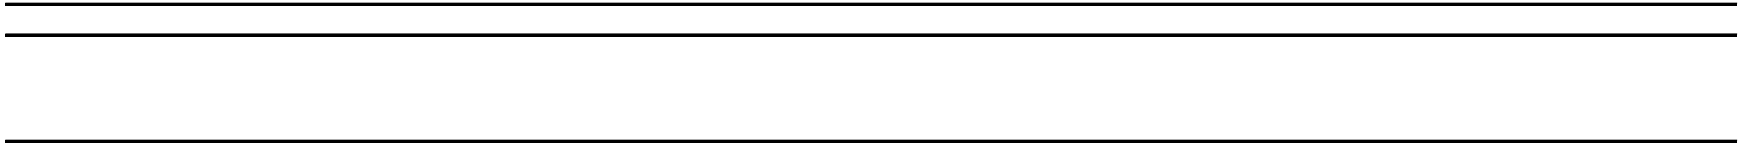

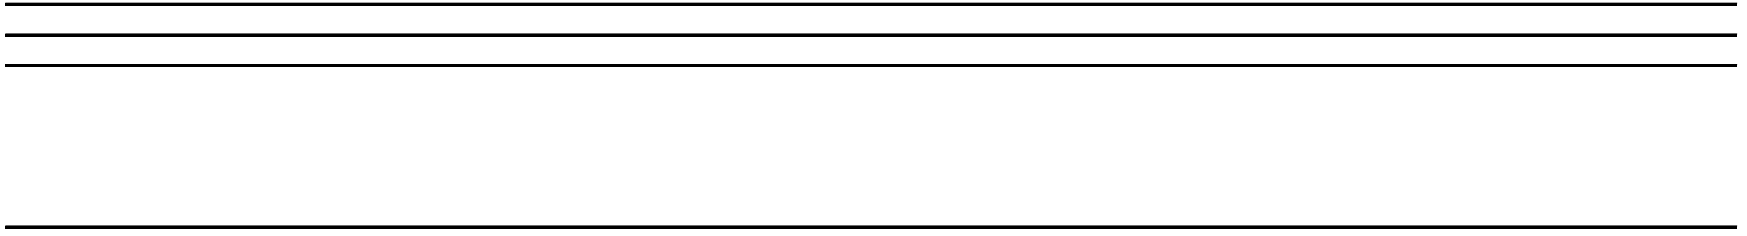



---

---
