# Supplementary material for: Prevalence of early-onset neonatal infection among newborns of mothers with bacterial infection or colonization: a systematic review and meta-analysis
Source: PubMed Central journal article supplement (PMC4364328; doi:10.1186/s12879-015-0813-3), 2015-03-07
Supplement: 12879_2015_813_MOESM3_ESM.pdf [file 12879_2015_813_MOESM3_ESM.pdf]

**Appendix Table 3. Studies included in systematic review and meta-analysis: Maternal exposure and neonatal outcome combinations**

| <b>Author</b> | <b>Year</b> | <b>Maternal infection and Neonatal infection</b> | <b>Maternal colonization and neonatal infection</b> | <b>Maternal colonization and neonatal colonization</b> | <b>Maternal risk factors and neonatal infection</b> | <b>Other</b> |
|---------------|-------------|--------------------------------------------------|-----------------------------------------------------|--------------------------------------------------------|-----------------------------------------------------|--------------|
| AbeleHorn     | 1997        |                                                  | Meta-analysis                                       | Meta-analysis                                          |                                                     |              |
| Adriaanse     | 1995        |                                                  |                                                     | Meta-analysis                                          |                                                     |              |
| Andrews       | 2008        |                                                  | Meta-analysis                                       |                                                        |                                                     |              |
| Averbuch      | 1995        | Meta-analysis                                    |                                                     |                                                        |                                                     |              |
| Ayata         | 1994        |                                                  |                                                     | Meta-analysis                                          |                                                     |              |
| Ayengar       | 1991        |                                                  |                                                     | Meta-analysis                                          |                                                     |              |
| Berardi       | 2011        |                                                  |                                                     | Meta-analysis                                          |                                                     |              |
| Blott         | 1988        |                                                  |                                                     |                                                        | Meta-analysis                                       |              |
| Bobitt        | 1985        |                                                  | Meta-analysis                                       |                                                        |                                                     |              |
| Bobitt        | 1977        | Meta-analysis                                    |                                                     |                                                        | Meta-analysis                                       |              |
| Bourgeois-    | 2010        |                                                  |                                                     | Meta-analysis                                          |                                                     |              |
| Boyer         | 1981        |                                                  | Meta-analysis                                       |                                                        |                                                     |              |
| Broekhuizen   | 1985        | Meta-analysis                                    |                                                     |                                                        |                                                     |              |
| Buckler       | 2010        |                                                  | Meta-analysis                                       |                                                        |                                                     |              |
| Burman        | 1992        |                                                  | Meta-analysis                                       |                                                        |                                                     |              |
| Canpolat      | 2011        |                                                  |                                                     |                                                        | Meta-analysis                                       |              |
| Cararach      | 1998        |                                                  |                                                     |                                                        | Meta-analysis                                       |              |
| Carlan*       | 1997        |                                                  |                                                     |                                                        |                                                     | Qualitative  |
| Christensen   | 1982        |                                                  | Meta-analysis                                       |                                                        |                                                     |              |
| Christmas     | 1992        |                                                  |                                                     |                                                        | Meta-analysis                                       |              |
| Coultrip      | 1994        | Meta-analysis                                    |                                                     |                                                        | Meta-analysis                                       |              |
| Craig         | 1996        | Meta-analysis                                    | Descriptive                                         | Descriptive                                            |                                                     |              |
| Cutland       | 2009        |                                                  |                                                     | Meta-analysis                                          |                                                     |              |
| de Araujo     | 1994        | Meta-analysis                                    |                                                     |                                                        |                                                     |              |
| Dollner       | 2002        | Meta-analysis                                    |                                                     |                                                        |                                                     |              |
| Dudley        | 1991        | Meta-analysis                                    |                                                     |                                                        |                                                     |              |
| Dutta         | 2010        | Meta-analysis                                    |                                                     |                                                        | Meta-analysis                                       |              |
| Easmon        | 1985        |                                                  |                                                     | Meta-analysis                                          |                                                     |              |
| Elder*        | 1971        | Qualitative                                      |                                                     |                                                        |                                                     |              |
| El-Kersh      | 2002        |                                                  |                                                     | Meta-analysis                                          |                                                     |              |
| Elzbieta      | 2009        |                                                  |                                                     | Meta-analysis                                          |                                                     |              |
| Eren          | 2005        |                                                  |                                                     | Meta-analysis                                          |                                                     |              |
| Faro          | 2010        |                                                  | Meta-analysis                                       |                                                        |                                                     |              |
| Feinstein     | 1986        | Meta-analysis                                    |                                                     |                                                        | Meta-analysis                                       |              |
| Franciosi     | 1973        |                                                  |                                                     | Meta-analysis                                          |                                                     |              |
| Frederiksen*  | 1992        |                                                  |                                                     |                                                        |                                                     | Qualitative  |
| Gauthier      | 1994        | Meta-analysis                                    |                                                     |                                                        | Meta-analysis                                       |              |
| Gerard        | 1979        |                                                  |                                                     | Meta-analysis                                          |                                                     |              |

**Appendix Table 3. Studies included in systematic review and meta-analysis: Maternal exposure and neonatal outcome combinations (continued)**

| <b>Author</b> | <b>Year</b> | <b>Maternal infection and Neonatal infection</b> | <b>Maternal colonization and neonatal infection</b> | <b>Maternal colonization and neonatal colonization</b> | <b>Maternal risk factors and neonatal infection</b> | <b>Other</b> |
|---------------|-------------|--------------------------------------------------|-----------------------------------------------------|--------------------------------------------------------|-----------------------------------------------------|--------------|
| Ghanim        | 2011        |                                                  | Meta-analysis                                       |                                                        |                                                     |              |
| Gibbs         | 1981        | Meta-analysis                                    |                                                     |                                                        |                                                     |              |
| Gibbs         | 1988        | Meta-analysis                                    |                                                     |                                                        |                                                     |              |
| Gilbert       | 2005        |                                                  |                                                     |                                                        | Meta-analysis                                       |              |
| Goldenberg    | 2008        | Meta-analysis                                    |                                                     |                                                        |                                                     |              |
| Graham        | 1982        |                                                  |                                                     |                                                        | Meta-analysis                                       |              |
| Hashavya      | 2011        |                                                  | Meta-analysis                                       |                                                        |                                                     |              |
| Hervas        | 1993        |                                                  |                                                     | Meta-analysis                                          |                                                     |              |
| Hickman       | 1999        |                                                  |                                                     | Meta-analysis                                          |                                                     |              |
| Hvckel        | 1992        |                                                  |                                                     |                                                        | Meta-analysis                                       |              |
| Itakura       | 1996        |                                                  | Meta-analysis                                       |                                                        | Meta-analysis                                       |              |
| Kadanali      | 2005        |                                                  |                                                     | Meta-analysis                                          |                                                     |              |
| Kafetzis      | 2004        |                                                  |                                                     | Meta-analysis                                          |                                                     |              |
| Kalinka       | 2006        |                                                  | Meta-analysis                                       |                                                        |                                                     |              |
| Kappy         | 1979        |                                                  |                                                     |                                                        | Meta-analysis                                       |              |
| Kasper        | 2010        | Meta-analysis                                    |                                                     |                                                        |                                                     |              |
| Kishore       | 1987        |                                                  | Meta-analysis                                       | Meta-analysis                                          |                                                     |              |
| Koh           | 1979        | Meta-analysis                                    |                                                     |                                                        |                                                     |              |
| Kollee        | 1989        |                                                  |                                                     | Meta-analysis                                          |                                                     |              |
| Kordek        | 2006        | Meta-analysis                                    |                                                     |                                                        | Meta-analysis                                       |              |
| Kordek        | 2011        | Meta-analysis                                    |                                                     |                                                        | Meta-analysis                                       |              |
| Kunze*        | 2006        |                                                  |                                                     |                                                        |                                                     | Qualitative  |
| Kunze         | 2011        |                                                  |                                                     | Meta-analysis                                          |                                                     |              |
| Liang         | 1986        |                                                  | Meta-analysis                                       | Meta-analysis                                          |                                                     |              |
| Lijoi         | 2007        |                                                  |                                                     | Meta-analysis                                          |                                                     |              |
| Lim           | 1997        |                                                  | Meta-analysis                                       |                                                        |                                                     |              |
| Matorras      | 1991        |                                                  | Meta-analysis                                       | Meta-analysis                                          |                                                     |              |
| Matsubara     | 2002        |                                                  | Meta-analysis                                       |                                                        |                                                     |              |
| Matsuda       | 1995        | Meta-analysis                                    |                                                     |                                                        |                                                     |              |
| McCaul        | 1992        |                                                  |                                                     |                                                        | Meta-analysis                                       |              |
| McGrady*      | 1985        | Qualitative                                      |                                                     |                                                        |                                                     |              |
| McLauchlin*   | 1990        |                                                  |                                                     |                                                        |                                                     | Qualitative  |
| Mercer        | 1999        | Meta-analysis                                    |                                                     |                                                        | Meta-analysis                                       |              |
| Mercer        | 1997        |                                                  | Meta-analysis                                       |                                                        | Meta-analysis                                       |              |
| Merenstein    | 1980        |                                                  |                                                     | Meta-analysis                                          |                                                     |              |
| Mitra         | 1997        | Meta-analysis                                    | Meta-analysis                                       |                                                        |                                                     |              |
| Mitsuda       | 1996        |                                                  |                                                     | Meta-analysis                                          |                                                     |              |
| Morales*      | 1989        |                                                  |                                                     |                                                        |                                                     | Qualitative  |
| Morales       | 1987        |                                                  | Meta-analysis                                       |                                                        |                                                     |              |

**Appendix Table 3. Studies included in systematic review and meta-analysis: Maternal exposure and neonatal outcome combinations (continued)**

| <b>Author</b>   | <b>Year</b> | <b>Maternal infection and Neonatal infection</b> | <b>Maternal colonization and neonatal infection</b> | <b>Maternal colonization and neonatal colonization</b> | <b>Maternal risk factors and neonatal infection</b> | <b>Other</b> |
|-----------------|-------------|--------------------------------------------------|-----------------------------------------------------|--------------------------------------------------------|-----------------------------------------------------|--------------|
| Morales         | 1986        |                                                  | Meta-analysis                                       |                                                        |                                                     |              |
| Muthusami       | 2007        |                                                  | Meta-analysis                                       |                                                        |                                                     |              |
| Nadisauskiene   | 1996        |                                                  |                                                     |                                                        | Meta-analysis                                       |              |
| Namavar         | 2008        |                                                  | Meta-analysis                                       | Meta-analysis                                          |                                                     |              |
| Jahromi         |             |                                                  |                                                     |                                                        |                                                     |              |
| Natale          | 1995        |                                                  | Meta-analysis                                       | Meta-analysis                                          |                                                     |              |
| Newton          | 1989        | Meta-analysis                                    |                                                     |                                                        |                                                     |              |
| Niduvaje        | 2006        |                                                  | Meta-analysis                                       |                                                        |                                                     |              |
| Nolla-Salas*    | 1998        | Qualitative                                      |                                                     |                                                        |                                                     |              |
| Orrett          | 2003        |                                                  | Meta-analysis                                       |                                                        |                                                     |              |
| Papantoniou     | 1997        | Meta-analysis                                    |                                                     |                                                        |                                                     |              |
| Pass            | 1982        | Meta-analysis                                    |                                                     |                                                        |                                                     |              |
| Pearson*        | 1967        | Qualitative                                      |                                                     |                                                        |                                                     |              |
| Persson*        | 1986        |                                                  |                                                     |                                                        |                                                     | Qualitative  |
| Philip          | 1982        | Meta-analysis                                    |                                                     |                                                        | Meta-analysis                                       |              |
| Pinter          | 2009        |                                                  |                                                     | Meta-analysis                                          |                                                     |              |
| Piper           | 1999        |                                                  | Meta-analysis                                       |                                                        |                                                     |              |
| Puchner         | 1993        | Meta-analysis                                    |                                                     |                                                        |                                                     |              |
| Puopolo         | 2011        | Meta-analysis                                    | Meta-analysis                                       |                                                        | Meta-analysis                                       |              |
| Pylipow         | 1994        |                                                  | Meta-analysis                                       | Meta-analysis                                          |                                                     |              |
| Quentin*        | 1989        |                                                  |                                                     |                                                        |                                                     | Qualitative  |
| Regan           | 1996        |                                                  | Meta-analysis                                       |                                                        |                                                     |              |
| Reid            | 1975        |                                                  | Meta-analysis                                       | Meta-analysis                                          |                                                     |              |
| Rosemond        | 1995        | Meta-analysis                                    |                                                     |                                                        |                                                     |              |
| Saez-Llorens    | 1995        |                                                  |                                                     | Meta-analysis                                          | Meta-analysis                                       |              |
| Sensini         | 1997        |                                                  | Meta-analysis                                       | Meta-analysis                                          |                                                     |              |
| Seoud           | 2010        |                                                  |                                                     | Meta-analysis                                          |                                                     |              |
| Simor           | 1990        |                                                  | Meta-analysis                                       |                                                        |                                                     |              |
| Smith*          | 2009        |                                                  |                                                     |                                                        |                                                     | Qualitative  |
| Sperling        | 1987        | Meta-analysis                                    |                                                     |                                                        |                                                     |              |
| Spinnato        | 1987        |                                                  |                                                     |                                                        | Meta-analysis                                       |              |
| Suara           | 1994        |                                                  |                                                     | Meta-analysis                                          |                                                     |              |
| Syrogianopoulos | 1990        |                                                  | Meta-analysis                                       | Meta-analysis                                          |                                                     |              |
| Tafari          | 1979        |                                                  |                                                     |                                                        | Meta-analysis                                       |              |
| Towers          | 1990        |                                                  | Meta-analysis                                       |                                                        |                                                     |              |
| Tsolia          | 2003        |                                                  |                                                     | Meta-analysis                                          |                                                     |              |
| Tuppurainen*    | 1989        |                                                  |                                                     |                                                        |                                                     | Qualitative  |
| Varner          | 1981        |                                                  |                                                     |                                                        | Meta-analysis                                       |              |

**Appendix Table 3. Studies included in systematic review and meta-analysis: Maternal exposure and neonatal outcome combinations (continued)**

| <b>Author</b> | <b>Year</b> | <b>Maternal infection and Neonatal infection</b> | <b>Maternal colonization and neonatal infection</b> | <b>Maternal colonization and neonatal colonization</b> | <b>Maternal risk factors and neonatal infection</b> | <b>Other</b> |
|---------------|-------------|--------------------------------------------------|-----------------------------------------------------|--------------------------------------------------------|-----------------------------------------------------|--------------|
| Vergani*      | 2002        |                                                  |                                                     |                                                        |                                                     | Qualitative  |
| Visconti      | 1985        |                                                  |                                                     | Meta-analysis                                          |                                                     |              |
| Volumenie     | 2001        |                                                  | Meta-analysis                                       |                                                        |                                                     |              |
| Wallace       | 1983        | Meta-analysis                                    |                                                     |                                                        |                                                     |              |
| Weintraub     | 1983        |                                                  |                                                     | Meta-analysis                                          |                                                     |              |
| Wilson        | 1982        | Meta-analysis                                    |                                                     |                                                        | Meta-analysis                                       |              |
| Wood*         | 1981        | Qualitative                                      |                                                     |                                                        |                                                     |              |
| Yoon          | 2000        | Meta-analysis                                    |                                                     |                                                        |                                                     |              |

\* 15 studies were not included in the quantitative meta-analyses, but were included in the qualitative assessment.
