# Supplementary material for: Prevalence of early-onset neonatal infection among newborns of mothers with bacterial infection or colonization: a systematic review and meta-analysis
Source: PubMed Central journal article supplement (PMC4364328; doi:10.1186/s12879-015-0813-3), 2015-03-07
Supplement: 12879_2015_813_MOESM4_ESM.pdf [file 12879_2015_813_MOESM4_ESM.pdf]

**Appendix Table 4. Maternal exposure and neonatal outcome definitions and prevalences**

| Author    | Year | Maternal lab confirmed infection     |      | Maternal clinical signs |      | Maternal colonization                           |      | Neonatal lab confirmed sepsis |      | Neonatal clinical signs of sepsis |      | Neonatal colonization                                      |      | Neonatal infection or clinical signs |      |
|-----------|------|--------------------------------------|------|-------------------------|------|-------------------------------------------------|------|-------------------------------|------|-----------------------------------|------|------------------------------------------------------------|------|--------------------------------------|------|
|           |      | Definition                           | Prev | Definition              | Prev | Definition                                      | Prev | Definition                    | Prev | Definition                        | Prev | Definition                                                 | Prev | Definition                           | Prev |
| AbeleHorn | 1997 |                                      |      |                         |      | U. urealyticum vagina culture                   | 0.67 |                               |      |                                   |      |                                                            |      |                                      |      |
| Adriaanse | 1995 |                                      |      |                         |      | GBS anorectum, introital, or cervical culture   | 0.19 |                               |      |                                   |      | GBS ear, pharynx, umbilicus culture                        | 0.11 |                                      |      |
| Andrews   | 2008 |                                      |      |                         |      | MRSA anus, vagina culture                       | 0.15 | MRSA culture                  | 0.00 |                                   |      |                                                            |      |                                      |      |
| Averbuch  | 1995 | amniotic fluid culture or gram stain | 0.67 |                         |      |                                                 |      | blood culture                 | 0.12 |                                   |      |                                                            |      |                                      |      |
| Ayata     | 1994 |                                      |      |                         |      | GBS rectum, vagina introitus and cervical swabs | 0.09 |                               |      |                                   |      | GBS throat, ear, umbilicus, conjunctival sac, skin culture | 0.04 |                                      |      |
| Ayengar   | 1991 |                                      |      |                         |      | high vagina swabs                               | 0.57 |                               |      |                                   |      |                                                            |      |                                      |      |
| Berardi   | 2011 |                                      |      |                         |      | GBS swab culture                                | 0.25 |                               |      |                                   |      | GBS ear, pharynx, rectum culture                           | 0.14 |                                      |      |
| Blott     | 1988 |                                      |      |                         |      |                                                 |      | undefined in paper            | 0.07 |                                   |      |                                                            |      |                                      |      |
| Bobitt    | 1985 |                                      |      |                         |      | GBS swab culture                                | 0.11 |                               |      | clinical signs                    | 0.04 |                                                            |      |                                      |      |
| Bobitt    | 1977 | blood and amniotic fluid cultures    | 0.58 |                         |      |                                                 |      | blood of csf culture          | 0.17 |                                   |      |                                                            |      |                                      |      |

**Appendix Table 4. Maternal exposure and neonatal outcome definitions and prevalences (continued)**

| Author             | Year | Maternal lab confirmed infection                |      | Maternal clinical signs |      | Maternal colonization    |      | Neonatal lab confirmed sepsis    |      | Neonatal clinical signs of sepsis               |      | Neonatal colonization                         |      | Neonatal infection or clinical signs |      |
|--------------------|------|-------------------------------------------------|------|-------------------------|------|--------------------------|------|----------------------------------|------|-------------------------------------------------|------|-----------------------------------------------|------|--------------------------------------|------|
|                    |      | Definition                                      | Prev | Definition              | Prev | Definition               | Prev | Definition                       | Prev | Definition                                      | Prev | Definition                                    | Prev | Definition                           | Prev |
| Bourgeois-Nicolaos | 2010 |                                                 |      |                         |      | S. aureus vagina culture | 0.06 |                                  |      |                                                 |      | S. aureus ear, gastric fluid culture          | 0.04 |                                      |      |
| Boyer              | 1981 |                                                 |      |                         |      | GBS vagina culture       | 0.17 | undefined in paper blood culture | 0.00 |                                                 |      |                                               |      |                                      |      |
| Broekhuizen        | 1985 | amniotic fluid culture or gram stain, placental | 0.28 |                         |      |                          |      |                                  | 0.04 |                                                 |      |                                               |      |                                      |      |
| Buckler            | 2010 |                                                 |      |                         |      |                          |      | blood culture                    | 0.00 |                                                 |      |                                               |      |                                      |      |
| Burman             | 1992 |                                                 |      |                         |      | GBS vagina culture       | 0.18 | GBS blood or csf culture         | 0.00 |                                                 |      |                                               |      |                                      |      |
| Canpolat           | 2011 |                                                 |      |                         |      |                          |      |                                  |      | clinical signs                                  | 0.43 |                                               |      |                                      |      |
| Cararach           | 1998 |                                                 |      |                         |      |                          |      |                                  |      |                                                 |      |                                               |      |                                      |      |
| Carlan             | 1997 |                                                 |      |                         |      |                          |      |                                  |      |                                                 |      |                                               |      |                                      |      |
| Christensen        | 1982 |                                                 |      |                         |      |                          |      |                                  |      |                                                 |      |                                               |      | blood culture and pneumonia          | 0.06 |
| Christmas          | 1992 |                                                 |      |                         |      |                          |      |                                  |      | clinical and radiographic findings of pneumonia | 0.09 |                                               |      |                                      |      |
| Coultrip           | 1994 | amniotic fluid culture                          | 0.13 |                         |      |                          |      |                                  |      |                                                 |      |                                               |      |                                      |      |
| Craig              | 1996 |                                                 |      |                         |      | placenta, vagina swab    | 0.00 |                                  |      |                                                 |      | listeria gastric aspirate and surface culture | 0.68 |                                      |      |



**Appendix Table 4. Maternal exposure and neonatal outcome definitions and prevalences (continued)**

| Author     | Year | Maternal lab confirmed infection |      | Maternal clinical signs |      | Maternal colonization                 |      | Neonatal lab confirmed sepsis |      | Neonatal clinical signs of sepsis |      | Neonatal colonization                 |      | Neonatal infection or clinical signs |      |
|------------|------|----------------------------------|------|-------------------------|------|---------------------------------------|------|-------------------------------|------|-----------------------------------|------|---------------------------------------|------|--------------------------------------|------|
|            |      | Definition                       | Prev | Definition              | Prev | Definition                            | Prev | Definition                    | Prev | Definition                        | Prev | Definition                            | Prev | Definition                           | Prev |
| Ghanim     | 2011 |                                  |      |                         |      | GBS and S. aureus rectovagina culture | 0.00 |                               |      |                                   |      |                                       |      |                                      |      |
| Gibbs      | 1981 |                                  |      |                         |      |                                       |      |                               |      |                                   |      |                                       |      |                                      |      |
| Gibbs      | 1988 |                                  |      |                         |      |                                       |      | blood, csf culture            | 0.09 |                                   |      |                                       |      |                                      |      |
| Gilbert    | 2005 |                                  |      |                         |      |                                       |      | blood culture                 | 0.05 |                                   |      |                                       |      |                                      |      |
| Goldenberg | 2008 |                                  |      |                         |      |                                       |      | umbilical cord blood culture  | 0.23 |                                   |      |                                       |      |                                      |      |
| Graham     | 1982 |                                  |      |                         |      |                                       |      |                               |      |                                   |      |                                       |      |                                      |      |
| Hashavya   | 2011 |                                  |      |                         |      |                                       |      | blood, csf culture            | 0.00 |                                   |      |                                       |      |                                      |      |
| Hervas     | 1993 |                                  |      |                         |      | GBS vagina culture                    | 0.07 |                               |      |                                   |      |                                       |      |                                      |      |
| Hickman    | 1999 |                                  |      |                         |      | GBS vagina and rectum swab            | 0.28 |                               |      |                                   |      | GBS throat, rectum, umbilicus culture | 0.14 |                                      |      |
| Hvckel     | 1992 |                                  |      |                         |      |                                       |      | blood culture                 | 0.10 |                                   |      |                                       |      |                                      |      |
| Itakura    | 1996 |                                  |      |                         |      |                                       |      |                               |      |                                   |      |                                       |      |                                      |      |
| Kadanali   | 2005 |                                  |      |                         |      | GBS vagina and rectum culture         | 0.32 |                               |      |                                   |      | GBS ear, throat, umbilicus culture    | 0.17 |                                      |      |

**Appendix Table 4. Maternal exposure and neonatal outcome definitions and prevalences (continued)**

| Author   | Year | Maternal lab confirmed infection |      | Maternal clinical signs |      | Maternal colonization                                                    |      | Neonatal lab confirmed sepsis |      | Neonatal clinical signs of sepsis       |      | Neonatal colonization                                               |      | Neonatal infection or clinical signs   |      |
|----------|------|----------------------------------|------|-------------------------|------|--------------------------------------------------------------------------|------|-------------------------------|------|-----------------------------------------|------|---------------------------------------------------------------------|------|----------------------------------------|------|
|          |      | Definition                       | Prev | Definition              | Prev | Definition                                                               | Prev | Definition                    | Prev | Definition                              | Prev | Definition                                                          | Prev | Definition                             | Prev |
| Kafetzis | 2004 |                                  |      |                         |      | vagina secretion                                                         | 0.37 |                               |      |                                         |      | U. urealyticum rhinopharyngeal secretion or tracheal lavage culture | 0.17 |                                        |      |
| Kalinka  | 2006 |                                  |      |                         |      | vagina colonization with m. hominis, u. urealyticum, bacterial vaginosis | 0.43 |                               |      |                                         |      |                                                                     |      | blood, urine culture or clinical signs | 0.18 |
| Kappy    | 1979 |                                  |      |                         |      |                                                                          |      |                               |      |                                         |      | surface culture; gastric aspirate gram stain                        | 0.26 |                                        |      |
| Kasper   | 2010 | amniotic fluid culture PCR       | 0.27 |                         |      |                                                                          |      |                               |      | inflammatory markers and clinical signs | 0.21 |                                                                     |      |                                        |      |
| Kishore  | 1987 |                                  |      |                         |      | vagina culture                                                           | 0.70 |                               |      |                                         |      | ear, nose, skin culture                                             | 0.44 |                                        |      |
| Koh      | 1979 |                                  |      | chorio                  | 0.01 |                                                                          |      |                               |      |                                         |      |                                                                     |      |                                        |      |
| Kollee   | 1989 |                                  |      |                         |      | GBS cervical and anal swab                                               | 0.18 |                               |      |                                         |      | nose, ear, anus, umbilicus culture                                  | 0.15 |                                        |      |

**Appendix Table 4. Maternal exposure and neonatal outcome definitions and prevalences (continued)**

| Author     | Year | Maternal lab confirmed infection |      | Maternal clinical signs |      | Maternal colonization                        |      | Neonatal lab confirmed sepsis |      | Neonatal clinical signs of sepsis |      | Neonatal colonization                    |      | Neonatal infection or clinical signs |      |
|------------|------|----------------------------------|------|-------------------------|------|----------------------------------------------|------|-------------------------------|------|-----------------------------------|------|------------------------------------------|------|--------------------------------------|------|
|            |      | Definition                       | Prev | Definition              | Prev | Definition                                   | Prev | Definition                    | Prev | Definition                        | Prev | Definition                               | Prev | Definition                           | Prev |
| Kordek     | 2006 |                                  |      |                         |      |                                              |      |                               |      |                                   |      |                                          |      | blood culture or clinical signs      | 0.33 |
| Kordek     | 2011 |                                  |      |                         |      |                                              |      |                               |      |                                   |      |                                          |      |                                      |      |
| Kunze      | 2006 |                                  |      |                         |      |                                              |      |                               |      |                                   |      |                                          |      |                                      |      |
| Kunze      | 2011 |                                  |      |                         |      | GBS rectovagina culture                      | 0.21 |                               |      |                                   |      | GBS external canal culture               | 0.02 |                                      |      |
| Liang      | 1986 |                                  |      |                         |      | GBS endocervix, perineum and rectum cultures | 0.19 |                               |      |                                   |      | GBS ear, nose, throat, umbilicus culture | 0.20 |                                      |      |
| Lijoi      | 2007 |                                  |      |                         |      | GBS vagina, rectum or urine culture          | 0.16 |                               |      |                                   |      | GBS ear, nose, pharynx culture           | 0.03 |                                      |      |
| Lim        | 1997 |                                  |      |                         |      | GBS vagina and rectum culture                | 0.10 |                               |      |                                   |      |                                          |      |                                      |      |
| Matorras   | 1991 |                                  |      |                         |      | GBS vagina and rectum culture                | 0.12 |                               |      | undefined in paper                | 0.14 |                                          |      |                                      |      |
| Matsubara  | 2002 |                                  |      |                         |      | GBS vagina culture                           | 0.08 | undefined in paper            | 0.00 |                                   |      |                                          |      |                                      |      |
| Matsuda    | 1995 |                                  | 0.20 |                         |      |                                              |      |                               |      |                                   |      |                                          |      |                                      |      |
| McCaul     | 1992 |                                  |      |                         |      |                                              |      |                               |      |                                   |      |                                          |      |                                      |      |
| McGrady    | 1985 | urinary tract infection          | 0.00 |                         |      |                                              |      |                               |      |                                   |      |                                          |      |                                      |      |
| McLauchlin | 1990 |                                  |      |                         |      |                                              |      |                               |      |                                   |      |                                          |      |                                      |      |
| Mercer     | 1999 |                                  |      |                         |      |                                              |      | blood, csf culture            | 0.01 |                                   |      |                                          |      |                                      |      |

**Appendix Table 4. Maternal exposure and neonatal outcome definitions and prevalences (continued)**

| Author          | Year | Maternal lab confirmed infection |      | Maternal clinical signs                          |      | Maternal colonization           |      | Neonatal lab confirmed sepsis |      | Neonatal clinical signs of sepsis |      | Neonatal colonization            |      | Neonatal infection or clinical signs |      |
|-----------------|------|----------------------------------|------|--------------------------------------------------|------|---------------------------------|------|-------------------------------|------|-----------------------------------|------|----------------------------------|------|--------------------------------------|------|
|                 |      | Definition                       | Prev | Definition                                       | Prev | Definition                      | Prev | Definition                    | Prev | Definition                        | Prev | Definition                       | Prev | Definition                           | Prev |
| Mercer          | 1997 |                                  |      |                                                  |      | GBS vagina culture              | 0.19 |                               |      |                                   |      |                                  |      | blood culture or clinical signs      | 0.06 |
| Merenstein      | 1980 |                                  |      |                                                  |      | GBS vagina and cervical culture | 0.12 |                               |      |                                   |      | GBS ear, throat culture          | 0.04 |                                      |      |
| Mitra           | 1997 |                                  |      |                                                  |      |                                 |      | blood culture                 | 0.19 |                                   |      |                                  |      |                                      |      |
| Mitsuda         | 1996 |                                  |      |                                                  |      | S. aureus vagina culture        | 0.08 |                               |      |                                   |      | S. aureus nose culture           | 0.10 |                                      |      |
| Morales         | 1989 |                                  |      |                                                  |      | GBS cervical culture            | 0.29 |                               |      |                                   |      |                                  |      |                                      |      |
| Morales         | 1987 |                                  |      |                                                  |      | GBS vagina culture              | 0.32 |                               |      |                                   |      |                                  |      |                                      |      |
| Morales         | 1986 |                                  |      |                                                  |      | GBS vagina culture              | 0.22 |                               |      |                                   |      |                                  |      |                                      |      |
| Muthusami       | 2007 |                                  |      |                                                  |      | vagina swab                     | 0.32 |                               |      | clinical signs                    | 0.29 |                                  |      |                                      |      |
| Nadisauskiene   | 1996 |                                  |      |                                                  |      |                                 |      | undefined in paper            | 0.66 |                                   |      |                                  |      |                                      |      |
| Namavar Jahromi | 2008 |                                  |      |                                                  |      | GBS rectovagina culture         | 0.09 |                               |      |                                   |      | skin, ear, mouth, throat culture | 0.06 |                                      |      |
| Natale          | 1995 |                                  |      |                                                  |      | GBS vagina and rectum culture   | 0.11 |                               |      |                                   |      | GBS ear, phrynx culture          | 0.04 |                                      |      |
| Newton          | 1989 |                                  |      | intra-amniotic infection based on clinical signs | 0.04 |                                 |      | blood culture                 | 0.01 |                                   |      |                                  |      |                                      |      |





**Appendix Table 4. Maternal exposure and neonatal outcome definitions and prevalences (continued)**

| Author       | Year | Maternal lab confirmed infection |      | Maternal clinical signs |      | Maternal colonization         |      | Neonatal lab confirmed sepsis |      | Neonatal clinical signs of sepsis |      | Neonatal colonization                         |      | Neonatal infection or clinical signs |      |
|--------------|------|----------------------------------|------|-------------------------|------|-------------------------------|------|-------------------------------|------|-----------------------------------|------|-----------------------------------------------|------|--------------------------------------|------|
|              |      | Definition                       | Prev | Definition              | Prev | Definition                    | Prev | Definition                    | Prev | Definition                        | Prev | Definition                                    | Prev | Definition                           | Prev |
| Regan        | 1996 |                                  |      |                         |      | GBS cervicovagina culture     | 0.21 | GBS blood, csf culture        | 0.00 |                                   |      |                                               |      |                                      |      |
| Reid         | 1975 |                                  |      |                         |      | GBS vagina culture            | 0.05 |                               |      | clinical signs                    | 0.00 | GBS eye, ear, throat, nose, umbilicus culture | 0.00 |                                      |      |
| Rosemond     | 1995 |                                  |      | chorioamnionitis        | 0.15 |                               |      | blood, csf culture            | 0.06 |                                   |      |                                               |      |                                      |      |
| Saez-Llorens | 1995 |                                  |      |                         |      | vagina and rectum culture     | 0.07 | blood culture                 | 0.03 |                                   |      |                                               |      |                                      |      |
| Sensini      | 1997 |                                  |      |                         |      | GBS vagina culture            | 0.11 |                               |      |                                   |      | GBS ear, pharynx, gastric aspirate culture    | 0.05 |                                      |      |
| Seoud        | 2010 |                                  |      |                         |      | GBS vagina and rectum culture | 0.18 |                               |      |                                   |      | GBS ear, pharynx, rectum culture              | 0.07 |                                      |      |
| Simor        | 1990 |                                  |      |                         |      |                               |      |                               |      |                                   |      |                                               |      |                                      |      |
| Smith        | 2009 |                                  |      |                         |      |                               |      |                               |      |                                   |      |                                               |      |                                      |      |
| Sperling     | 1987 |                                  |      |                         |      |                               |      | blood culture                 | 0.06 |                                   |      |                                               |      |                                      |      |
| Spinnato     | 1987 |                                  |      |                         |      |                               |      |                               |      |                                   |      |                                               |      |                                      |      |
| Suara        | 1994 |                                  |      |                         |      | GBS vagina or rectum culture  | 0.22 |                               |      |                                   |      | GBS throat, umbilicus, rectum culture         | 0.23 |                                      |      |

**Appendix Table 4. Maternal exposure and neonatal outcome definitions and prevalences (continued)**

| Author          | Year | Maternal lab confirmed infection |      | Maternal clinical signs |      | Maternal colonization          |      | Neonatal lab confirmed sepsis |      | Neonatal clinical signs of sepsis |      | Neonatal colonization                              |      | Neonatal infection or clinical signs |      |
|-----------------|------|----------------------------------|------|-------------------------|------|--------------------------------|------|-------------------------------|------|-----------------------------------|------|----------------------------------------------------|------|--------------------------------------|------|
|                 |      | Definition                       | Prev | Definition              | Prev | Definition                     | Prev | Definition                    | Prev | Definition                        | Prev | Definition                                         | Prev | Definition                           | Prev |
| Syrogianopoulos | 1990 |                                  |      |                         |      | U. urealyticum vagina culture  | 0.35 |                               |      |                                   |      | U. urealyticum throat, eye, female vaginal culture | 0.55 |                                      |      |
| Tafari          | 1979 |                                  |      |                         |      |                                |      | blood culture                 | 0.36 |                                   |      |                                                    |      |                                      |      |
| Towers          | 1990 |                                  |      |                         |      | GBS cervicovagina culture      | 0.15 | GBS blood culture             | 0.02 |                                   |      |                                                    |      |                                      |      |
| Tsolia          | 2003 |                                  |      |                         |      | GBS vagina or rectum culture   | 0.07 |                               |      |                                   |      | GBS ear, throat, umbilicus culture                 | 0.02 |                                      |      |
| Tuppurainen     | 1989 |                                  |      |                         |      | GBS vagina latex agglutination | 0.05 |                               |      |                                   |      |                                                    |      |                                      |      |
| Varner          | 1981 |                                  |      |                         |      |                                |      | blood culture                 | 0.07 |                                   |      |                                                    |      |                                      |      |
| Vergani         | 2002 |                                  |      | clinical risk factors   | 0.16 |                                |      |                               |      |                                   |      |                                                    |      |                                      |      |
| Visconti        | 1985 |                                  |      |                         |      | GBS cervicovagina culture      | 0.08 |                               |      |                                   |      | GBS throat, umbilicus, ear culture                 | 0.05 |                                      |      |
| Volumenie       | 2001 |                                  |      |                         |      | GBS vagina culture             | 0.14 |                               |      |                                   |      |                                                    |      | blood culture or clinical signs      | 0.01 |
| Wallace         | 1983 | H. influenzae blood culture      | 0.00 |                         |      |                                |      | H. influenzae blood culture   | 0.00 |                                   |      |                                                    |      |                                      |      |

**Appendix Table 4. Maternal exposure and neonatal outcome definitions and prevalences (continued)**

| Author                                               | Year | Maternal lab confirmed infection |      | Maternal clinical signs       |      | Maternal colonization |      | Neonatal lab confirmed sepsis |      | Neonatal clinical signs of sepsis |      | Neonatal colonization      |      | Neonatal infection or clinical signs |      |
|------------------------------------------------------|------|----------------------------------|------|-------------------------------|------|-----------------------|------|-------------------------------|------|-----------------------------------|------|----------------------------|------|--------------------------------------|------|
|                                                      |      | Definition                       | Prev | Definition                    | Prev | Definition            | Prev | Definition                    | Prev | Definition                        | Prev | Definition                 | Prev | Definition                           | Prev |
| Weintraub                                            | 1983 |                                  |      |                               |      | GBS vagina culture    | 0.03 |                               |      |                                   |      | GBS ear, umbilicus culture | 0.02 |                                      |      |
| Wilson                                               | 1982 |                                  |      | clinical diagnosis with fever | 0.08 |                       |      | blood, urine, csf culture     | 0.07 |                                   |      |                            |      |                                      |      |
| Wood                                                 | 1981 | urine culture                    | 0.08 |                               |      |                       |      | undefined in paper            | 0.00 |                                   |      |                            |      |                                      |      |
| Yoon                                                 | 2000 | amniotic fluid culture           | 0.27 |                               |      |                       |      |                               |      |                                   |      |                            |      |                                      |      |
| GBS: Group B Streptococcus; CSF: Cerebrospinal fluid |      |                                  |      |                               |      |                       |      |                               |      |                                   |      |                            |      |                                      |      |
