# Supplementary material for: Prevalence of early-onset neonatal infection among newborns of mothers with bacterial infection or colonization: a systematic review and meta-analysis
Source: PubMed Central journal article supplement (PMC4364328; doi:10.1186/s12879-015-0813-3), 2015-03-07
Supplement: 12879_2015_813_MOESM5_ESM.pdf [file 12879_2015_813_MOESM5_ESM.pdf]

Figure 1. Risk of bias summary (continued)

|                  | Loss to follow-up/not evaluated/missing data (attrition bias) | Method of handling missing data (attrition bias) | Exposed and non-exposed from the same population (selection bias) | Blinding of participants and personnel to the exposures (performance bias) | Blinding of outcome assessment to the exposures (detection bias) | Misclassification or measurement errors of exposure (information bias) | Misclassification or measurement errors of outcome (information bias) | Addressing potential confounders (confounding bias) | Other bias | Overall rating |
|------------------|---------------------------------------------------------------|--------------------------------------------------|-------------------------------------------------------------------|----------------------------------------------------------------------------|------------------------------------------------------------------|------------------------------------------------------------------------|-----------------------------------------------------------------------|-----------------------------------------------------|------------|----------------|
| Elzbieta 2009    | ?                                                             |                                                  | ?                                                                 | ?                                                                          | +                                                                | +                                                                      | +                                                                     | ?                                                   | +          | ?              |
| Eren 2005        | ?                                                             |                                                  | -                                                                 | ?                                                                          | +                                                                | +                                                                      | +                                                                     | -                                                   | +          | -              |
| Faro 2010        | -                                                             | -                                                | +                                                                 | -                                                                          | -                                                                | +                                                                      | +                                                                     | -                                                   | -          | +              |
| Franciosi 1973   | -                                                             | -                                                | ?                                                                 | +                                                                          | +                                                                | +                                                                      | +                                                                     | ?                                                   | +          | ?              |
| Frederiksen 1992 | ?                                                             |                                                  | ?                                                                 | ?                                                                          | ?                                                                | +                                                                      | +                                                                     | ?                                                   | +          | ?              |
| Gerard 1979      | ?                                                             |                                                  | -                                                                 | -                                                                          | -                                                                | +                                                                      | +                                                                     | -                                                   | -          | -              |
| Ghanim 2011      | -                                                             |                                                  | -                                                                 | -                                                                          | -                                                                | +                                                                      | ?                                                                     |                                                     | -          | -              |
| Gibbs 1981       | ?                                                             |                                                  | ?                                                                 | -                                                                          | -                                                                | +                                                                      | -                                                                     |                                                     | +          | -              |
| Gibbs 1988       | +                                                             |                                                  |                                                                   | -                                                                          | +                                                                | +                                                                      | +                                                                     |                                                     | -          | +              |
| Gilbert 2005     | +                                                             | ?                                                |                                                                   | -                                                                          | ?                                                                | -                                                                      | +                                                                     | ?                                                   | +          | -              |
| Goffinet 2005    | ?                                                             |                                                  | ?                                                                 | ?                                                                          | ?                                                                | +                                                                      | -                                                                     | ?                                                   | +          | -              |
| Goldenberg 2008  | ?                                                             |                                                  | ?                                                                 | ?                                                                          | ?                                                                | +                                                                      | +                                                                     | +                                                   | +          | ?              |
| Gomez 1998       | ?                                                             |                                                  | ?                                                                 | -                                                                          | -                                                                | -                                                                      | -                                                                     | +                                                   | -          | -              |
| Graham 1982      | ?                                                             |                                                  |                                                                   | -                                                                          | -                                                                | -                                                                      | +                                                                     |                                                     | +          | -              |
| Hashavya 2011    | ?                                                             |                                                  | ?                                                                 | -                                                                          | -                                                                | +                                                                      | +                                                                     | ?                                                   | -          | ?              |
| Hervas 1993      | ?                                                             |                                                  | ?                                                                 | ?                                                                          | ?                                                                | +                                                                      | +                                                                     |                                                     | +          | ?              |
| Hickman 1999     | ?                                                             |                                                  | +                                                                 | +                                                                          | +                                                                | +                                                                      | +                                                                     | -                                                   | +          | +              |
| Höckel 1992      | ?                                                             |                                                  |                                                                   | -                                                                          | +                                                                | -                                                                      | +                                                                     | -                                                   | +          | -              |
| Itakura 1996     | ?                                                             |                                                  | +                                                                 | ?                                                                          | ?                                                                | +                                                                      | -                                                                     | -                                                   | +          | -              |
| Kadanali 2005    | ?                                                             |                                                  | -                                                                 | -                                                                          | -                                                                | +                                                                      | +                                                                     | -                                                   | -          | -              |
| Kafetzis 2004    | ?                                                             |                                                  | -                                                                 | ?                                                                          | ?                                                                | +                                                                      | +                                                                     | -                                                   | -          | -              |
| Kalinka 2006     | +                                                             |                                                  | ?                                                                 | ?                                                                          | ?                                                                | +                                                                      | -                                                                     | ?                                                   | +          | -              |
| Kappy 1979       | ?                                                             |                                                  | ?                                                                 | ?                                                                          | ?                                                                | +                                                                      | +                                                                     |                                                     | -          | ?              |
| Kasper 2010      | +                                                             |                                                  | +                                                                 | ?                                                                          | ?                                                                | +                                                                      | -                                                                     | ?                                                   | +          | -              |
| Kishore 1987     | ?                                                             |                                                  | ?                                                                 | +                                                                          | +                                                                | +                                                                      | +                                                                     | ?                                                   | +          | ?              |
| Koh 1979         |                                                               |                                                  | ?                                                                 | -                                                                          | -                                                                | -                                                                      | ?                                                                     |                                                     | +          | -              |
| Kollee 1989      | ?                                                             |                                                  | ?                                                                 | ?                                                                          | ?                                                                | +                                                                      | +                                                                     | ?                                                   | -          | ?              |
| Kordek 2006      | ?                                                             |                                                  |                                                                   | -                                                                          | -                                                                | -                                                                      | -                                                                     | ?                                                   | -          | -              |
| Kordek 2011      | ?                                                             |                                                  | ?                                                                 | -                                                                          | -                                                                | -                                                                      | +                                                                     | ?                                                   | +          | -              |
| Kunze 2006       | ?                                                             |                                                  | ?                                                                 | -                                                                          | +                                                                | +                                                                      | +                                                                     | ?                                                   | -          | ?              |
| Kunze 2011       | ?                                                             |                                                  | ?                                                                 | -                                                                          | ?                                                                | +                                                                      | +                                                                     | ?                                                   | +          | -              |

Figure 1. Risk of bias summary (continued)

|                    | Loss to follow-up/not evaluated/missing data (attrition bias) | Method of handling missing data (attrition bias) | Exposed and non-exposed from the same population (selection bias) | Blinding of participants and personnel to the exposures (performance bias) | Blinding of outcome assessment to the exposures (detection bias) | Misclassification or measurement errors of exposure (information bias) | Misclassification or measurement errors of outcome (information bias) | Addressing potential confounders (confounding bias) | Other bias | Overall rating |
|--------------------|---------------------------------------------------------------|--------------------------------------------------|-------------------------------------------------------------------|----------------------------------------------------------------------------|------------------------------------------------------------------|------------------------------------------------------------------------|-----------------------------------------------------------------------|-----------------------------------------------------|------------|----------------|
| Liang 1986         | ?                                                             |                                                  | +                                                                 | +                                                                          | +                                                                | +                                                                      | +                                                                     | ?                                                   | +          | +              |
| Lijoi 2007         | ?                                                             | ?                                                | +                                                                 | ?                                                                          | +                                                                | +                                                                      | +                                                                     | +                                                   | +          | ?              |
| Lim 1997           | ?                                                             | ?                                                | ?                                                                 | ?                                                                          | +                                                                | +                                                                      |                                                                       |                                                     | +          | ?              |
| Matorras 1991      | ?                                                             | ?                                                | +                                                                 | +                                                                          | +                                                                | +                                                                      |                                                                       |                                                     | +          | ?              |
| Matsubara 2002     | ?                                                             | +                                                | ?                                                                 | ?                                                                          | +                                                                | ?                                                                      |                                                                       |                                                     | +          | ?              |
| Matsuda 1995       | ?                                                             | ?                                                | ?                                                                 | ?                                                                          | +                                                                | +                                                                      | ?                                                                     |                                                     | +          | ?              |
| McCaul 1992        | +                                                             |                                                  | ?                                                                 | +                                                                          | +                                                                | +                                                                      | ?                                                                     |                                                     | +          | +              |
| McGrady 1985       |                                                               |                                                  | +                                                                 | +                                                                          | ?                                                                | ?                                                                      | +                                                                     |                                                     | +          | +              |
| McLauchlin 1990    |                                                               | ?                                                | ?                                                                 | ?                                                                          | +                                                                | +                                                                      | ?                                                                     |                                                     | +          | ?              |
| Mercer 1997        | +                                                             |                                                  | ?                                                                 | ?                                                                          | ?                                                                | +                                                                      | +                                                                     | ?                                                   | +          | ?              |
| Mercer 1999        | ?                                                             | ?                                                | ?                                                                 | ?                                                                          | +                                                                | +                                                                      | ?                                                                     |                                                     | +          | +              |
| Merenstein 1980    | ?                                                             | ?                                                |                                                                   | +                                                                          | +                                                                | +                                                                      | ?                                                                     |                                                     | +          | ?              |
| Mitra 1997         | ?                                                             | ?                                                | +                                                                 | +                                                                          | +                                                                | +                                                                      |                                                                       |                                                     | +          | ?              |
| Mitsuda 1996       | ?                                                             | ?                                                | ?                                                                 | ?                                                                          | +                                                                | +                                                                      | ?                                                                     |                                                     | +          | ?              |
| Morales 1986       | ?                                                             | ?                                                | +                                                                 | +                                                                          | +                                                                | +                                                                      |                                                                       |                                                     | +          | ?              |
| Morales 1987       | ?                                                             | ?                                                | +                                                                 | ?                                                                          | +                                                                | +                                                                      |                                                                       |                                                     | +          | ?              |
| Morales 1989       | ?                                                             | ?                                                | ?                                                                 | ?                                                                          | +                                                                | +                                                                      | ?                                                                     |                                                     | +          | ?              |
| Muthusami 2007     | ?                                                             | +                                                | ?                                                                 | ?                                                                          | +                                                                | +                                                                      | ?                                                                     |                                                     | +          | +              |
| Nadisauskiene 1996 | ?                                                             | +                                                | +                                                                 | +                                                                          | +                                                                | ?                                                                      | ?                                                                     |                                                     | +          | +              |
| Namavar 2008       | +                                                             |                                                  | +                                                                 | +                                                                          | +                                                                | +                                                                      | +                                                                     |                                                     | +          | +              |
| Natale 1995        | +                                                             | +                                                | ?                                                                 | ?                                                                          | ?                                                                | +                                                                      | +                                                                     | +                                                   | +          | ?              |
| Newton 1999        | +                                                             | +                                                | +                                                                 | +                                                                          | ?                                                                | +                                                                      | ?                                                                     |                                                     | +          | +              |
| Niduvaje 2006      | ?                                                             | ?                                                | +                                                                 | +                                                                          | +                                                                | +                                                                      |                                                                       |                                                     | +          | ?              |
| Nolla-Salas 1998   |                                                               |                                                  | ?                                                                 | ?                                                                          | ?                                                                | +                                                                      | +                                                                     | ?                                                   | +          | ?              |
| Nomura 2005        | +                                                             |                                                  | +                                                                 | ?                                                                          | ?                                                                | +                                                                      | +                                                                     | +                                                   | +          | +              |
| Oddie 2002         | ?                                                             | ?                                                | +                                                                 | +                                                                          | +                                                                | +                                                                      | +                                                                     |                                                     | +          | +              |
| Orrett 2003        | ?                                                             |                                                  | +                                                                 | +                                                                          | +                                                                | +                                                                      | ?                                                                     |                                                     | +          | +              |
| Papantoniou 1997   | +                                                             | +                                                | ?                                                                 | ?                                                                          | +                                                                | +                                                                      | ?                                                                     |                                                     | +          | ?              |
| Pass 1982          | ?                                                             | ?                                                | ?                                                                 | ?                                                                          | +                                                                | ?                                                                      | ?                                                                     |                                                     | +          | ?              |
| Persson 1986       | ?                                                             | ?                                                | ?                                                                 | ?                                                                          | +                                                                | +                                                                      | ?                                                                     |                                                     | +          | ?              |
| Philip 1982        | ?                                                             | ?                                                | +                                                                 | +                                                                          | +                                                                | +                                                                      |                                                                       |                                                     | +          | +              |
| Pinter 2009        | +                                                             | +                                                | ?                                                                 | ?                                                                          | ?                                                                | +                                                                      | +                                                                     | ?                                                   | +          | ?              |

Figure 1. Risk of bias summary (continued)

|                      | Less to follow-up/not evaluated/missing data (attrition bias) | Method of handling missing data (attrition bias) | Exposed and non-exposed from the same population (selection bias) | Blinding of participants and personnel to the exposures (performance bias) | Blinding of outcome assessment to the exposures (detection bias) | Misclassification or measurement errors of exposure (information bias) | Misclassification or measurement errors of outcome (information bias) | Addressing potential confounders (confounding bias) | Other bias | Overall rating |
|----------------------|---------------------------------------------------------------|--------------------------------------------------|-------------------------------------------------------------------|----------------------------------------------------------------------------|------------------------------------------------------------------|------------------------------------------------------------------------|-----------------------------------------------------------------------|-----------------------------------------------------|------------|----------------|
| Piper 1999           | ?                                                             |                                                  | ?                                                                 | ?                                                                          | ?                                                                | +                                                                      | +                                                                     | +                                                   | +          | ?              |
| Puchner 1993         | ?                                                             |                                                  | ?                                                                 | ?                                                                          | ?                                                                | -                                                                      | -                                                                     |                                                     | -          | -              |
| Puopolo 2011         | ?                                                             |                                                  | -                                                                 |                                                                            |                                                                  | +                                                                      | +                                                                     | +                                                   | +          | -              |
| Pylypov 1994         | ?                                                             |                                                  | ?                                                                 | -                                                                          | -                                                                | +                                                                      | +                                                                     | ?                                                   | -          | ?              |
| Quentin 1989         |                                                               |                                                  |                                                                   | -                                                                          | -                                                                | +                                                                      | +                                                                     |                                                     | +          | +              |
| Regan 1996           | -                                                             | -                                                | -                                                                 | -                                                                          | ?                                                                | +                                                                      | +                                                                     | ?                                                   | -          | -              |
| Reid 1975            | ?                                                             |                                                  | ?                                                                 | -                                                                          | -                                                                | +                                                                      | +                                                                     |                                                     | -          | ?              |
| Rønnestad 2005       | ?                                                             |                                                  | ?                                                                 | ?                                                                          | ?                                                                | -                                                                      | +                                                                     | +                                                   | -          | -              |
| Rosemond 1995        | ?                                                             |                                                  | ?                                                                 | -                                                                          | -                                                                | +                                                                      | +                                                                     | ?                                                   | -          | ?              |
| Saez-Llorens 1995    | +                                                             | -                                                | ?                                                                 | ?                                                                          | +                                                                | +                                                                      | +                                                                     |                                                     | -          | ?              |
| Sensini 1997         | ?                                                             |                                                  | ?                                                                 | ?                                                                          | ?                                                                | +                                                                      | +                                                                     | ?                                                   | -          | ?              |
| Seoud 2010           | -                                                             | -                                                | +                                                                 | ?                                                                          | ?                                                                | +                                                                      | +                                                                     | -                                                   | -          | +              |
| Simor 1990           | ?                                                             |                                                  | ?                                                                 | -                                                                          | -                                                                | +                                                                      | -                                                                     |                                                     | +          | -              |
| Smith 2009           | -                                                             |                                                  |                                                                   | -                                                                          | -                                                                | +                                                                      | +                                                                     |                                                     | +          | +              |
| Sperling 1987        | ?                                                             |                                                  |                                                                   | -                                                                          | -                                                                | -                                                                      | +                                                                     |                                                     | -          | -              |
| Spinnato 1987        | ?                                                             |                                                  |                                                                   | -                                                                          | ?                                                                | -                                                                      | ?                                                                     |                                                     | -          | -              |
| Suara 1994           | -                                                             | -                                                | -                                                                 | ?                                                                          | ?                                                                | +                                                                      | +                                                                     | ?                                                   | +          | -              |
| Syrgiannopoulos 1990 | +                                                             |                                                  | ?                                                                 | -                                                                          | -                                                                | +                                                                      | +                                                                     |                                                     | +          | ?              |
| Tafari 1979          | ?                                                             |                                                  | ?                                                                 | ?                                                                          | ?                                                                | -                                                                      | +                                                                     | ?                                                   | -          | -              |
| Tameliene 2010       | ?                                                             |                                                  | ?                                                                 | ?                                                                          | ?                                                                | +                                                                      | +                                                                     | +                                                   | +          | ?              |
| Towers 1990          | ?                                                             |                                                  | ?                                                                 | ?                                                                          | ?                                                                | +                                                                      | ?                                                                     | ?                                                   | -          | ?              |
| Tsolia 2003          | -                                                             |                                                  | -                                                                 | ?                                                                          | ?                                                                | +                                                                      | +                                                                     | -                                                   | -          | -              |
| Tuppurainen 1989     | ?                                                             |                                                  | ?                                                                 | -                                                                          | -                                                                | +                                                                      | +                                                                     | ?                                                   | +          | ?              |
| Varner 1981          | ?                                                             |                                                  |                                                                   | -                                                                          | -                                                                | -                                                                      | +                                                                     |                                                     | -          | -              |
| Vergani 2002         | ?                                                             |                                                  | ?                                                                 | -                                                                          | -                                                                | +                                                                      | +                                                                     | ?                                                   | -          | ?              |
| Visconti 1985        | +                                                             |                                                  | ?                                                                 | ?                                                                          | +                                                                | +                                                                      | +                                                                     | ?                                                   | +          | ?              |
| Volumenie 2001       | -                                                             |                                                  | ?                                                                 | -                                                                          | -                                                                | +                                                                      | -                                                                     | ?                                                   | -          | -              |
| Wallace 1983         |                                                               |                                                  |                                                                   | -                                                                          | -                                                                | +                                                                      | +                                                                     |                                                     | +          | +              |
| Weintraub 1983       | ?                                                             |                                                  | ?                                                                 | ?                                                                          | ?                                                                | +                                                                      | +                                                                     | ?                                                   | +          | ?              |
| Wilson 1982          |                                                               |                                                  | ?                                                                 | -                                                                          | -                                                                | -                                                                      | +                                                                     | ?                                                   | -          | -              |
| Wood 1981            | ?                                                             |                                                  | ?                                                                 | -                                                                          | -                                                                | +                                                                      | +                                                                     |                                                     | -          | ?              |
| Yoon 2000            | ?                                                             |                                                  | +                                                                 | ?                                                                          | ?                                                                | -                                                                      | +                                                                     | +                                                   | +          | -              |
